# Supplementary material
Source: PubMed Central journal article supplement (PMC3603141)
Supplement: NIHMS451427-supplement-Supplementary_Figure_1.pdf [file NIHMS451427-supplement-Supplementary_Figure_1.pdf]

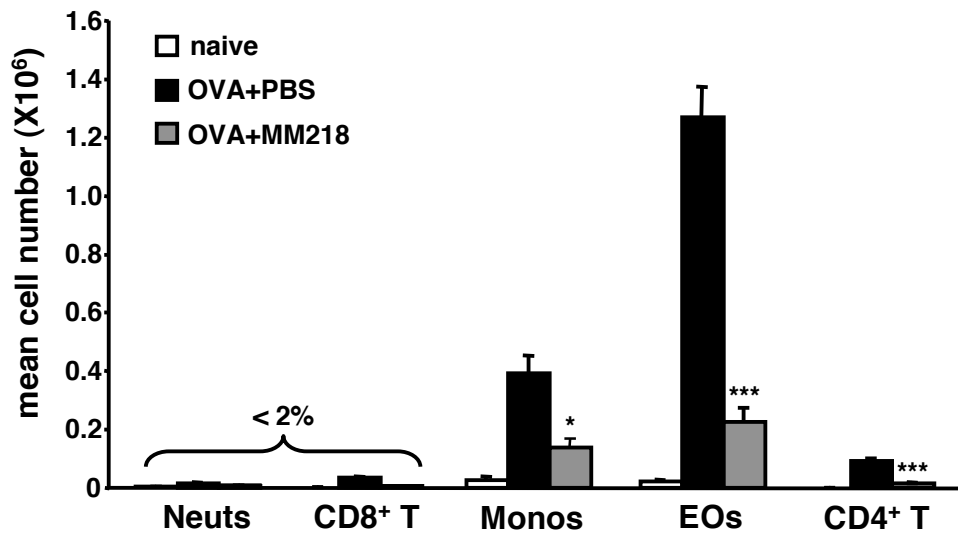

**Fig. S1. Distribution of leukocytes in airways of allergic mice after MM218 treatment.**

BAL fluid was collected from individual OVA primed/challenged mice treated i.p. with MM218 or PBS on days 7, 9 and 11 of the regimen. Leukocytes were analyzed by flow cytometry to establish the relative distribution of neutrophils, CD8<sup>+</sup> T cells, monocytes, eosinophils and CD4<sup>+</sup> T cells for the two groups, compared to airway cells from naïve mice. Data show mean cell numbers for each group (n=6 per group)  $\pm$  SE with a Student's t-test analysis used to determine statistically significant differences between OVA+MM218 and OVA+PBS groups. \*\*\* =  $P < 0.001$ ; \* =  $P < 0.05$ .
