# Supplementary material
Source: PubMed Central journal article supplement (PMC3603141)
Supplement: NIHMS451427-supplement-Supplementary_Figure_2.pdf [file NIHMS451427-supplement-Supplementary_Figure_2.pdf]

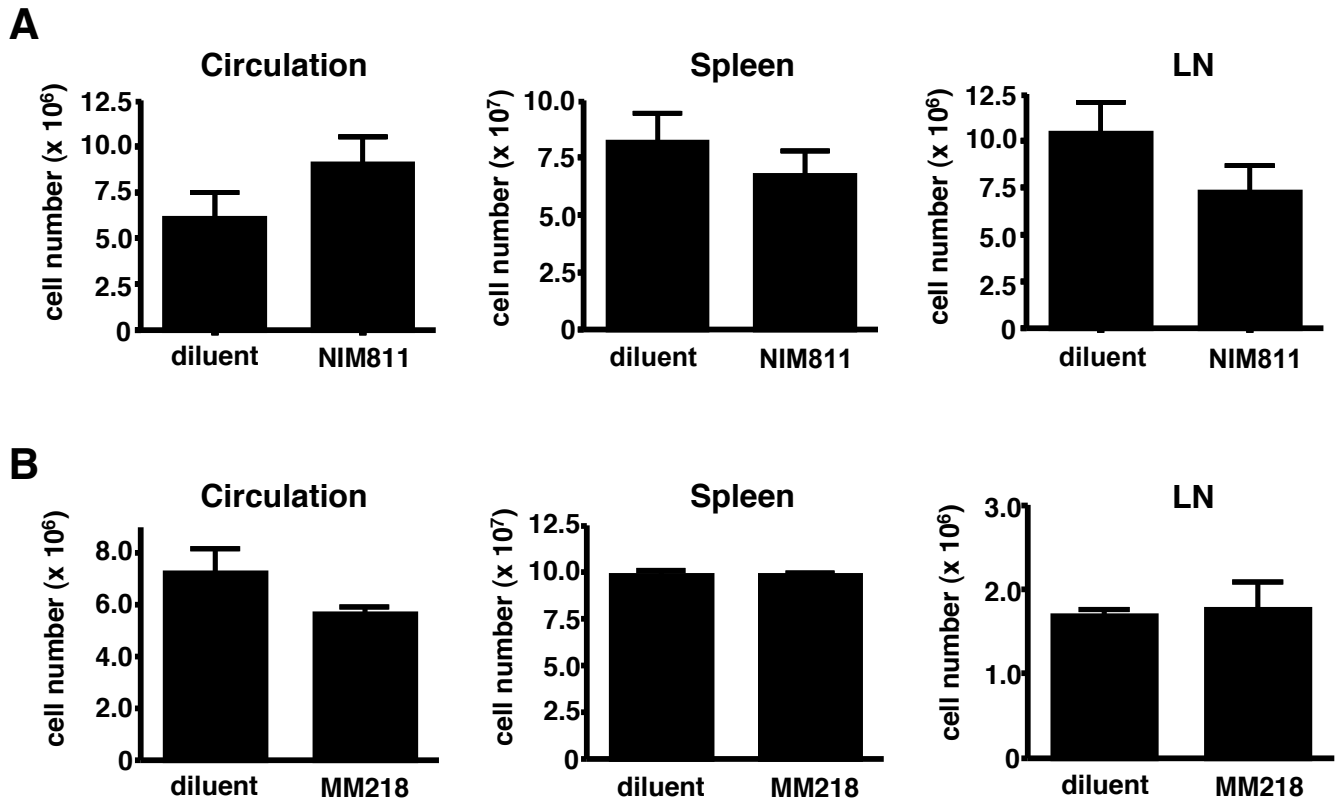

**Fig. S2. Mice treated with either NIM811 or MM218 do not exhibit systemic leukopenia.** Blood, spleen and mediastinal LN were collected from individual OVA primed/challenged mice treated i.p. (A) with NIM811 or PBS, or (B) with MM218 or PBS, on days 7, 9 and 11 of the regimen. Total leukocyte numbers were counted by hemacytometry. Data show mean  $\pm$  SE cell numbers for each group (n=6 mice per group).
